# Supplementary material
Source: Springer Nature journal article supplement (https://www.springermedizin.de/resource/supplementary/12963_2010_97_MOESM7_ESM.pdf/9572716)

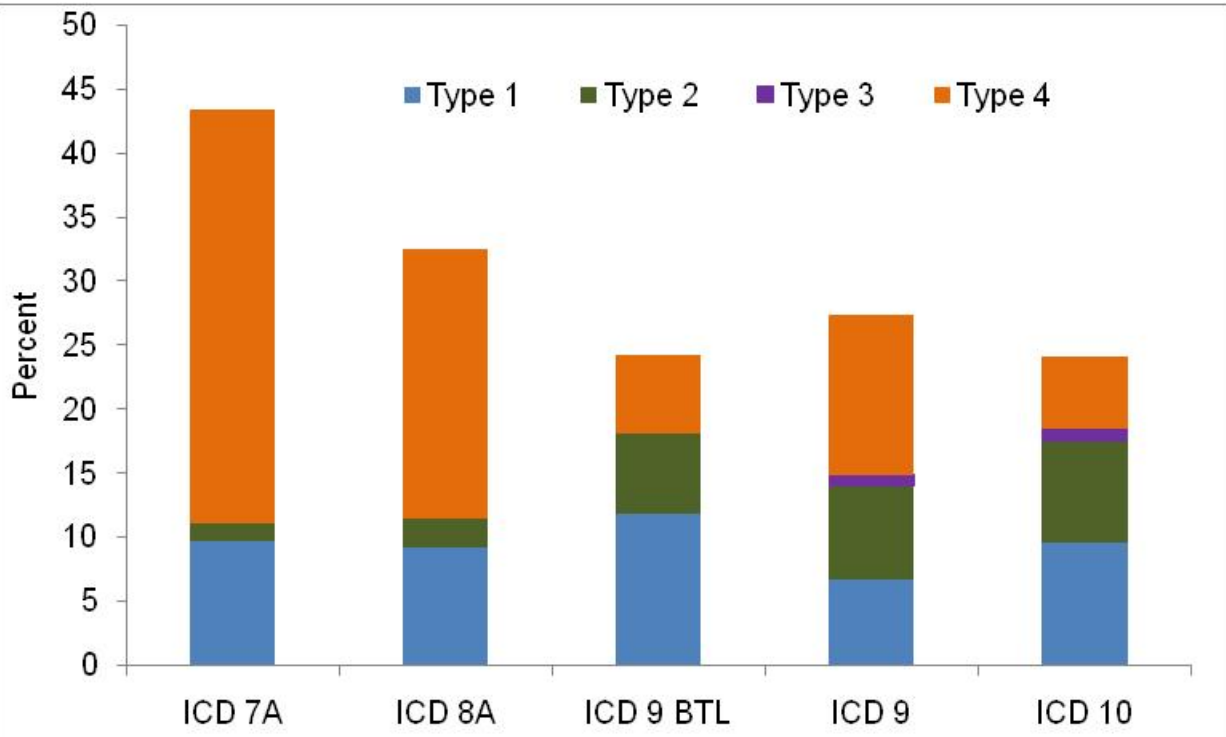

Supplement: MOESM7 [file 9572716]
